# Supplementary material for: Repellency of Carvacrol, Thymol, and Their Acetates against Imported Fire Ants
Source: MDPI journal article supplement (doi:10.3390/insects14100790), 2023-09-28
Supplement: s1 [file s1]

# Repellency of Carvacrol, Thymol, and Their Acetates against Imported Fire Ants

**Pradeep Paudel<sup>1</sup>, Farhan Mahmood Shah<sup>1</sup>, Dileep Kumar Guddeti<sup>1</sup>, Abbas Ali<sup>1</sup>, Jian Chen<sup>2</sup>, Ikhlas A. Khan<sup>1,3</sup>, and Xing-Cong Li<sup>1,3,\*</sup>**

<sup>1</sup> National Center for Natural Products Research, School of Pharmacy, The University of Mississippi, University, MS 38677, USA; phr.paudel@gmail.com (P.P.); fshah@olemiss.edu (F.M.S.); gdileepkumar19@gmail.com (D.K.G.); aali@olemiss.edu (A.A.); ikhan@olemiss.edu (I.A.K.)

<sup>2</sup> Biological Control of Pests Research Unit, USDA-ARS, Stoneville, MS 38776, USA; jian.chen@usda.gov

<sup>3</sup> Department of BioMolecular Sciences, School of Pharmacy, The University of Mississippi, University, MS 38677, USA

\*Correspondence: xcli7@olemiss.edu; Tel.: +1-662-915-6742

## Legends

**Figure S1:** GC-MS profiles of (a) thyme and (b) red-thyme essential oils.

**Figure S2:**  $^1\text{H}$ -NMR spectrum of carvacrol acetate in  $\text{CDCl}_3$ .

**Figure S3:**  $^{13}\text{C}$ -NMR spectrum of carvacrol acetate in  $\text{CDCl}_3$ .

**Figure S4:**  $^1\text{H}$ -NMR spectrum of thymol acetate in  $\text{CDCl}_3$ .

**Figure S5:**  $^{13}\text{C}$ -NMR spectrum of thymol acetate in  $\text{CDCl}_3$ .

**Table S1:** List of compounds in Red-Thyme oil identified by GC-MS analysis.

**Table S2:** List of compounds in Thyme oil identified by GC-MS analysis.

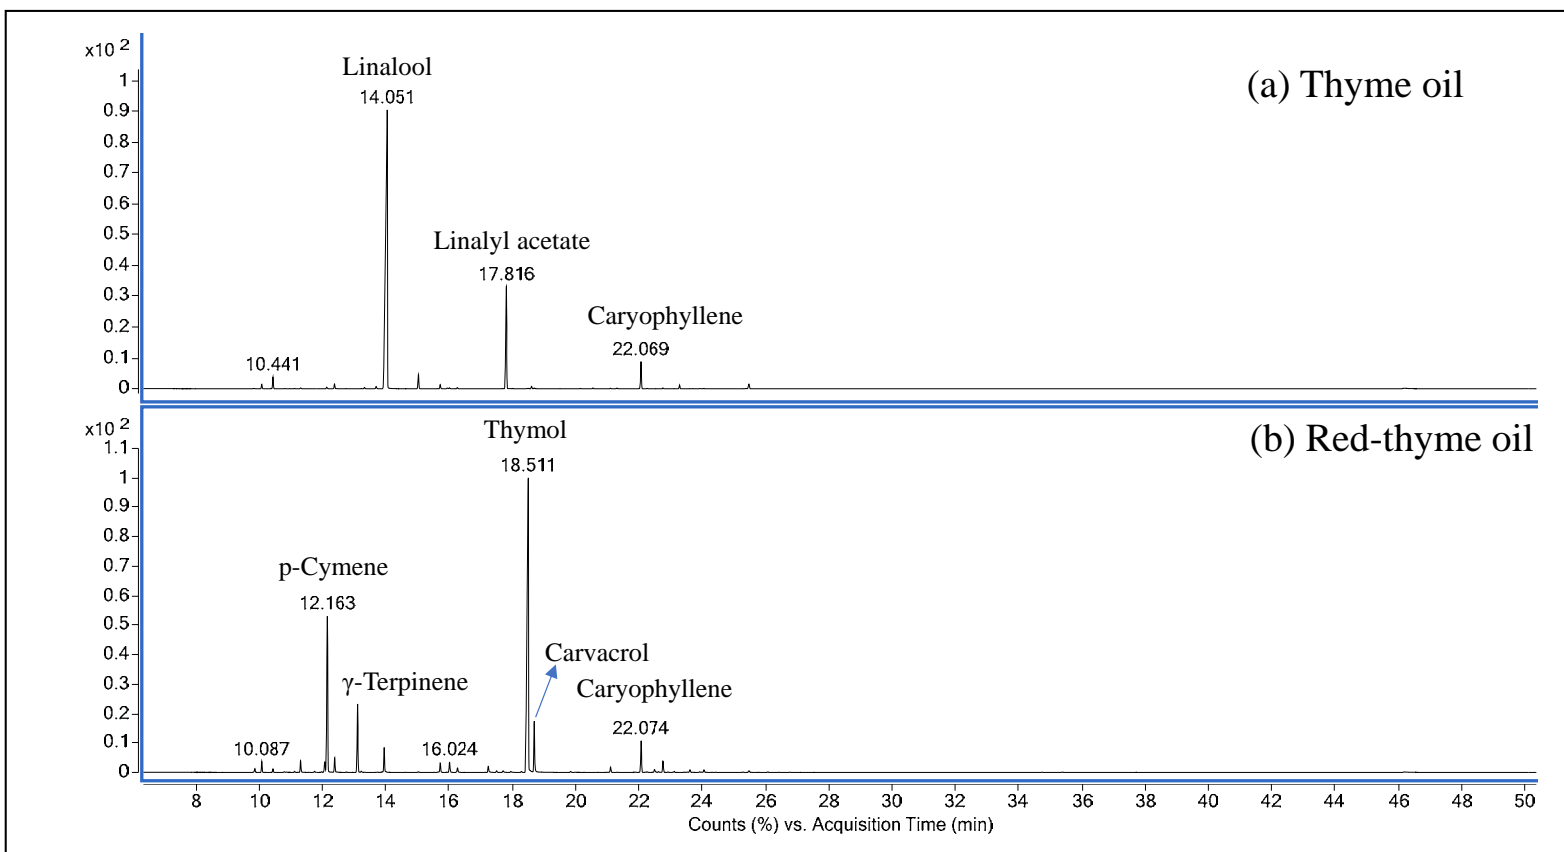

**Figure S1:** GC-MS profiles of (a) thyme and (b) red-thyme essential oils.

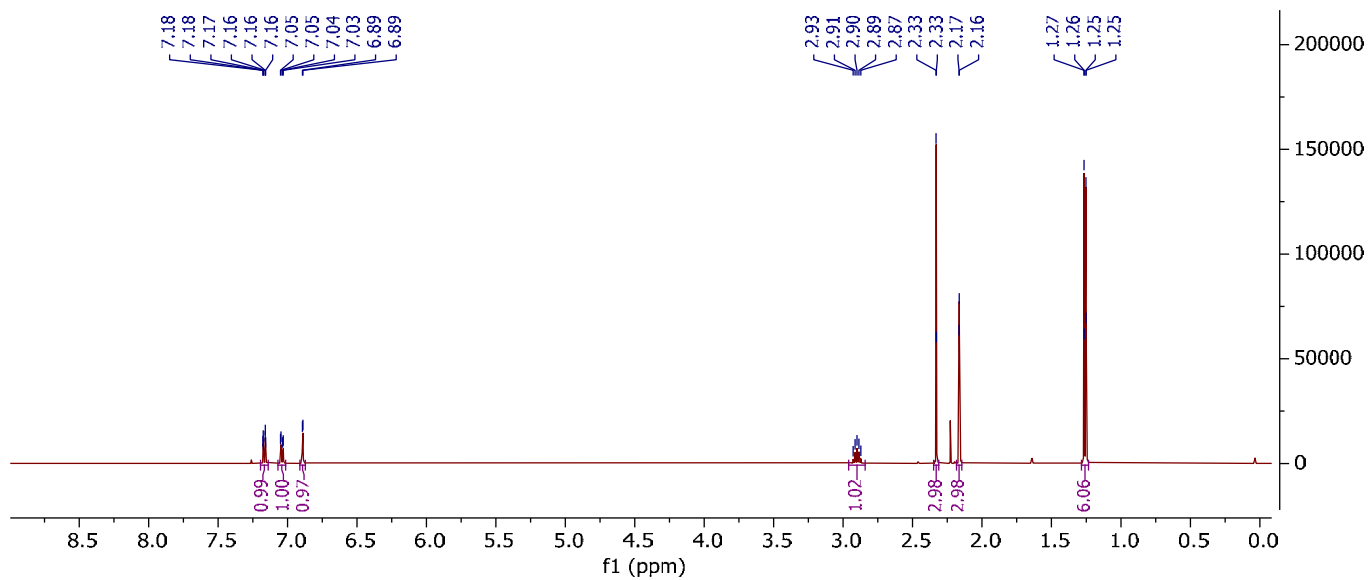

**Figure S2:** <sup>1</sup>H-NMR spectrum of carvacrol acetate in CDCl<sub>3</sub>.

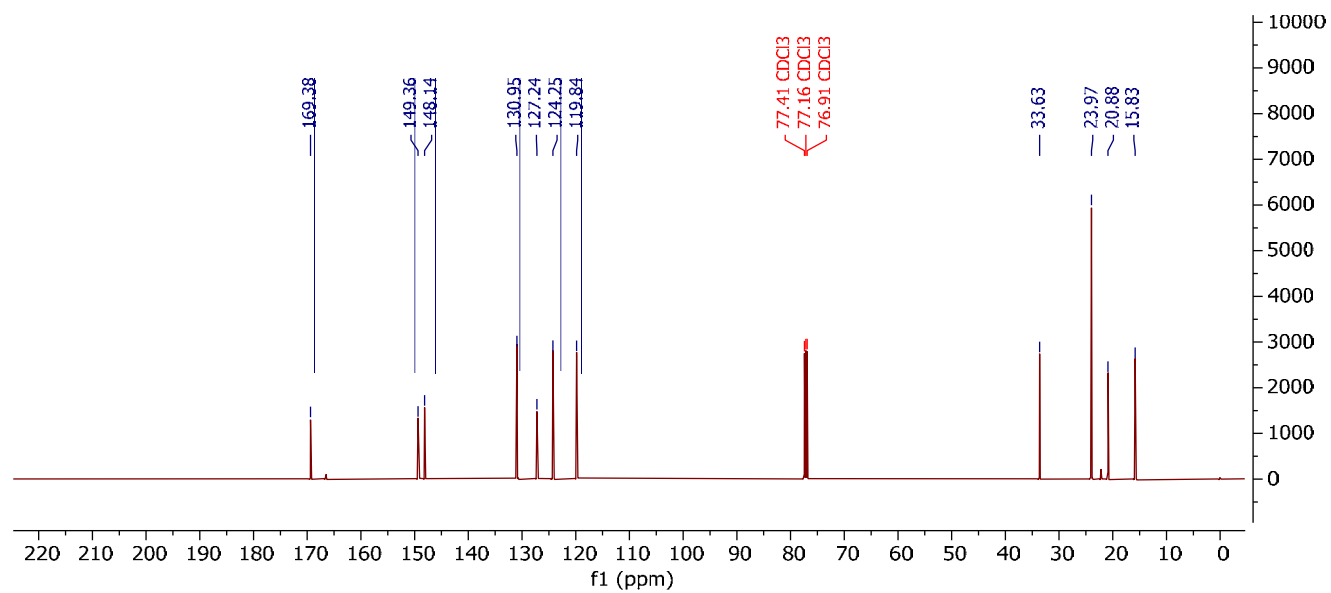

**Figure S3:** <sup>13</sup>C-NMR spectrum of carvacrol acetate in CDCl<sub>3</sub>.

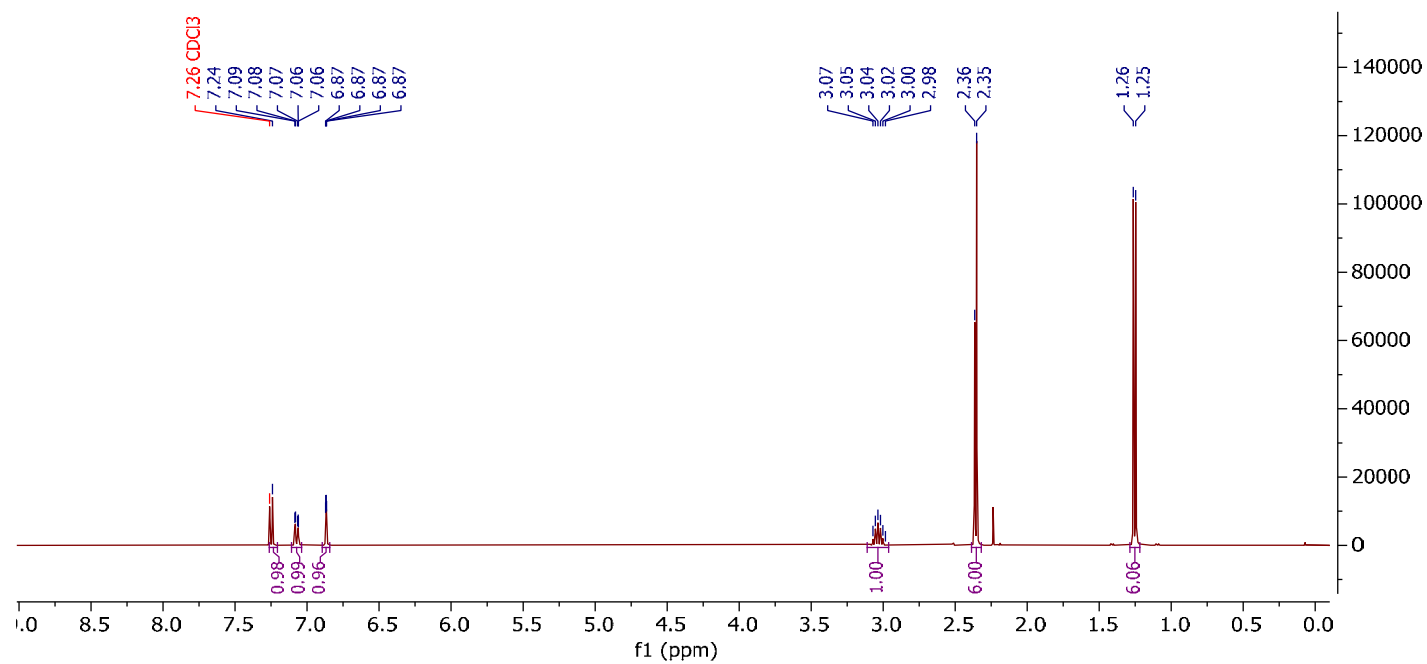

**Figure S4:** <sup>1</sup>H-NMR spectrum of thymol acetate in CDCl<sub>3</sub>.

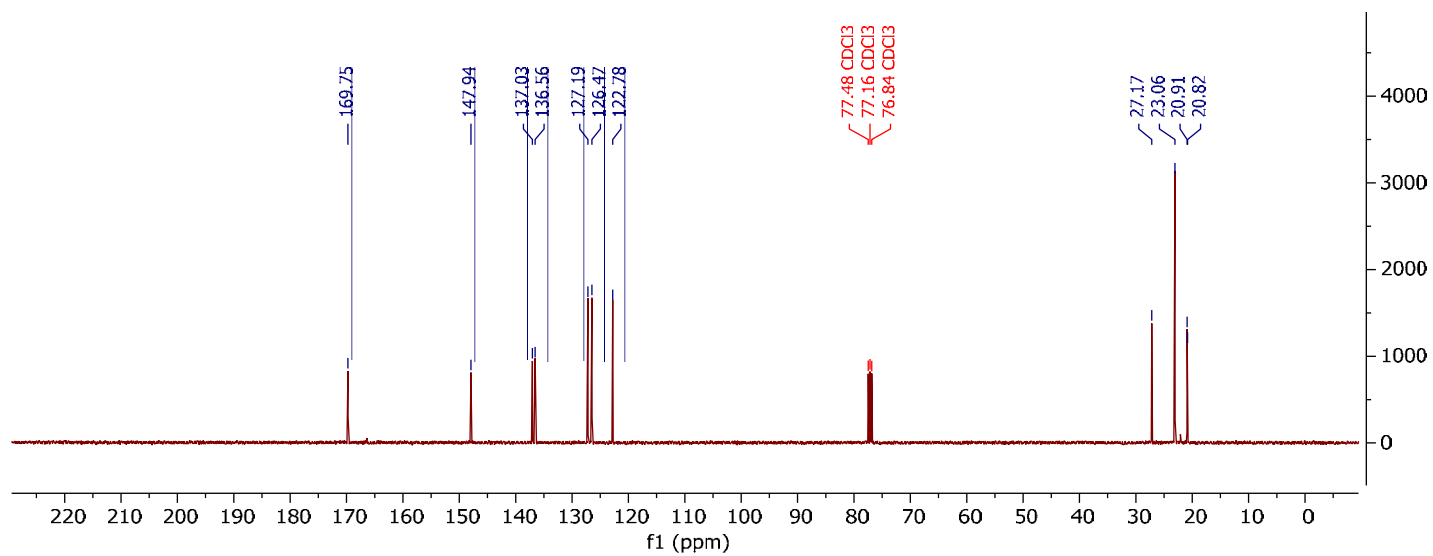

**Figure S5:**  $^{13}\text{C}$ -NMR spectrum of thymol acetate in  $\text{CDCl}_3$ .

**Table S1:** List of compounds in Red-Thyme oil identified by GC-MS analysis.

| S. NO | Retention time (min) | Compound                        | % Composition |
|-------|----------------------|---------------------------------|---------------|
| 1     | 9.869                | $\alpha$ -Thujene               | 0.369         |
| 2     | 10.086               | (+)- $\alpha$ -Pinene           | 0.958         |
| 3     | 10.442               | Camphene                        | 0.314         |
| 4     | 10.799               | 1-Octen-3-ol                    | 0.080         |
| 5     | 10.879               | 3-Octanone                      | 0.053         |
| 6     | 11.125               | $\beta$ -Pinene                 | 0.108         |
| 7     | 11.312               | $\beta$ -Myrcene                | 1.074         |
| 8     | 11.756               | $\alpha$ -Phellandrene          | 0.121         |
| 9     | 11.975               | 3-Carene                        | 0.069         |
| 10    | 12.077               | Terpinolene                     | 1.011         |
| 11    | 12.163               | p-Cymene                        | 16.321        |
| 12    | 12.393               | Eucalyptol                      | 1.423         |
| 13    | 12.751               | $\beta$ -Ocimene                | 0.049         |
| 14    | 13.115               | $\gamma$ -Terpinene             | 6.418         |
| 15    | 13.232               | $\beta$ -Terpineol              | 0.140         |
| 16    | 13.954               | Linalool                        | 2.432         |
| 17    | 15.040               | Camphor                         | 0.076         |
| 18    | 15.725               | (+)-Borneol                     | 1.018         |
| 19    | 16.024               | (-)-Terpinen-4-ol               | 1.049         |
| 20    | 16.270               | Terpineol                       | 0.528         |
| 21    | 17.244               | O-Methylthymol                  | 0.648         |
| 22    | 17.506               | Methyl Carvacrol                | 0.169         |
| 23    | 17.709               | Geraniol                        | 0.215         |
| 24    | 17.955               | Citral                          | 0.143         |
| 25    | 18.511               | Thymol                          | 48.829        |
| 26    | 18.699               | Carvacrol                       | 5.100         |
| 27    | 19.854               | 4-Isopropylanisole              | 0.107         |
| 28    | 20.282               | Carvacrol acetate               | 0.027         |
| 29    | 21.111               | $\alpha$ -Copaene               | 0.528         |
| 30    | 21.303               | $\beta$ -Bourbonene             | 0.027         |
| 31    | 22.074               | Caryophyllene                   | 3.137         |
| 32    | 22.496               | Aromandendrene                  | 0.363         |
| 33    | 22.764               | Humulene                        | 1.152         |
| 34    | 22.929               | Alloaromadendrene               | 0.056         |
| 35    | 23.122               | gamma.-Murolene                 | 0.127         |
| 36    | 23.614               | 10s,11s-Himachala-3(12),4-diene | 0.279         |
| 37    | 23.924               | (+)- $\alpha$ -Murolene         | 0.084         |
| 38    | 24.069               | Cadina-1(10),4-diene            | 0.276         |
| 39    | 25.486               | Caryophyllene oxide             | 0.202         |



**Table S2:** List of compounds in Thyme oil identified by GC-MS analysis.

| S. NO | Retention time (min) | Compound                              | % Composition |
|-------|----------------------|---------------------------------------|---------------|
| 1     | 10.088               | (+)- $\alpha$ -Pinene                 | 0.511         |
| 2     | 10.441               | Camphene                              | 1.325         |
| 3     | 11.125               | $\beta$ -Phellandrene                 | 0.050         |
| 4     | 11.318               | $\beta$ -Myrcene                      | 0.114         |
| 5     | 12.142               | p-Cymene                              | 0.227         |
| 6     | 12.387               | Eucalyptol                            | 0.583         |
| 7     | 13.336               | cis-Linalool oxide (furanoid)         | 0.171         |
| 8     | 13.704               | trans-Linalool oxide (furanoid)       | 0.299         |
| 9     | 14.051               | Linalool                              | 71.891        |
| 10    | 15.035               | Camphor                               | 1.704         |
| 11    | 15.727               | (+)-Borneol                           | 0.513         |
| 12    | 15.951               | 3,7-Octadiene-2,6-diol, 2,6-dimethyl- | 0.110         |
| 13    | 16.022               | (-)-Terpinen-4-ol                     | 0.154         |
| 14    | 16.267               | $\alpha$ -Terpineol                   | 0.180         |
| 15    | 17.816               | Linalyl acetate                       | 13.386        |
| 16    | 18.615               | Bornyl acetate                        | 0.303         |
| 17    | 18.696               | Carvacrol                             | 0.145         |
| 18    | 20.162               | Geranyl palmitate                     | 0.070         |
| 19    | 20.554               | Geranyl acetate                       | 0.111         |
| 20    | 21.309               | $\beta$ -Bourbonene                   | 0.090         |
| 21    | 22.069               | Caryophyllene                         | 3.385         |
| 22    | 22.272               | $\alpha$ -trans-Bergamotene           | 0.054         |
| 23    | 22.766               | Humulene                              | 0.105         |
| 24    | 23.290               | Germacrene D                          | 0.472         |
| 25    | 24.064               | Cadina-1(10),4-diene                  | 0.052         |
| 26    | 25.481               | Caryophyllene oxide                   | 0.716         |
